# Supplementary material for: Molecular Detection and Characterization of Babesia and Theileria in Cattle and Water Buffaloes from Southern Luzon, Philippines
Source: MDPI journal article supplement (doi:10.3390/microorganisms10040678), 2022-03-22
Supplement: s1 [file s1]

Supplementary Materials:

**Table S1.** Primers used in the study for the amplification of piroplasms (*Babesia/Theileria* spp.), specifically, *Babesia bigemina*, *B. bovis* and *Theileria orientalis*.

| Organism and Type of PCR                               | Target Gene                     | Primer Name       | Sequence (5' → 3')       | Expected Size (bp) | References |
|--------------------------------------------------------|---------------------------------|-------------------|--------------------------|--------------------|------------|
| Piroplasms ( <i>Babesia/ Theileria</i> spp.)<br>Nested | 18s rRNA                        | piro18s forward 1 | GGTGAAACTGCGAATGGCTC     | 1600               | [29]       |
|                                                        |                                 | piro18s reverse 1 | AAGTGATAAGGTTCACAAAACCTT |                    |            |
|                                                        |                                 | piro18s forward 2 | TGGCTCATTACAACAGTTATA    | 1500               |            |
|                                                        |                                 | piro18s reverse 2 | CGGTCCGAATAATTCACC       |                    |            |
| <i>Babesia bigemina</i><br>Conventional                | apical membrane antigen-1       | AMA-1 forward     | TACTGTGACGAGGACGGATC     | 211                | [30]       |
|                                                        |                                 | AMA-1 reverse     | CCTCAAAAGCAGATTCGAGT     |                    |            |
| <i>Babesia bovis</i><br>Nested                         | spherical body protein- 4       | SBP-4 forward     | GAAATCCCTGTTCCAGAG       | 907                | [31]       |
|                                                        |                                 | SBP-4 reverse     | TCGTTGATAACACTGCAA       |                    |            |
|                                                        |                                 | SBP-4 forward     | GAAATCCCTGTTCCAGAG       | 503                |            |
|                                                        |                                 | SBP-4 reverse     | TCGTTGATAACACTGCAA       |                    |            |
| <i>Theileria orientalis</i><br>Conventional            | major piroplasm surface protein | MPSP forward      | CTTTGCCTAGGATACTTCCT     | 776                | [32]       |
|                                                        |                                 | MPSP reverse      | ACGGCAAGTGGTGAGAACT      |                    |            |

**Table S2.** PCR conditions used in the study for the amplification of piroplasms (*Babesia/Theileria* spp.), specifically, *Babesia bigemina*, *B. bovis*, and *Theileria orientalis*.

| Target Gene                     | PCR Condition                                                                                                                                                                                                                                      |
|---------------------------------|----------------------------------------------------------------------------------------------------------------------------------------------------------------------------------------------------------------------------------------------------|
| 18s rRNA                        | 1 <sup>st</sup> round:<br>$\frac{95^{\circ}C}{9\ min} \rightarrow \left[ \frac{94^{\circ}C}{30\ s} - \frac{55^{\circ}C}{30\ s} - \frac{72^{\circ}C}{90\ s} \right] 35x \rightarrow \frac{72^{\circ}C}{7\ min} \rightarrow 10^{\circ}C\ \infty$     |
|                                 | 2 <sup>nd</sup> round:<br>$\frac{95^{\circ}C}{9\ min} \rightarrow \left[ \frac{94^{\circ}C}{30\ s} - \frac{53^{\circ}C}{30\ s} - \frac{72^{\circ}C}{90\ s} \right] 35x \rightarrow \frac{72^{\circ}C}{5\ min} \rightarrow 10^{\circ}C\ \infty$     |
| apical membrane antigen-1       | $\frac{95^{\circ}C}{5\ min} \rightarrow \left[ \frac{95^{\circ}C}{30\ s} - \frac{68^{\circ}C}{1\ min} - \frac{72^{\circ}C}{1\ min} \right] 35x \rightarrow \frac{72^{\circ}C}{10\ min} \rightarrow 10^{\circ}C\ \infty$                            |
| spherical body protein- 4       | 1 <sup>st</sup> round:<br>$\frac{95^{\circ}C}{5\ min} \rightarrow \left[ \frac{94^{\circ}C}{1\ min} - \frac{55^{\circ}C}{1\ min} - \frac{72^{\circ}C}{1\ min} \right] 35x \rightarrow \frac{72^{\circ}C}{10\ min} \rightarrow 10^{\circ}C\ \infty$ |
|                                 | 2 <sup>nd</sup> round:<br>$\frac{95^{\circ}C}{5\ min} \rightarrow \left[ \frac{94^{\circ}C}{1\ min} - \frac{55^{\circ}C}{1\ min} - \frac{72^{\circ}C}{1\ min} \right] 35x \rightarrow \frac{72^{\circ}C}{10\ min} \rightarrow 10^{\circ}C\ \infty$ |
| major piroplasm surface protein | $\frac{94^{\circ}C}{10\ min} \rightarrow \left[ \frac{94^{\circ}C}{1\ min} - \frac{58^{\circ}C}{1\ min} - \frac{72^{\circ}C}{1\ min} \right] 35x \rightarrow \frac{72^{\circ}C}{4\ min} \rightarrow 10^{\circ}C\ \infty$                           |
